# Supplementary material for: Screening key microRNAs for castration-resistant prostate cancer based on miRNA/mRNA functional synergistic network
Source: PubMed Central journal article supplement (PMC4791269; doi:10.18632/oncotarget.6102), 2015-10-31
Supplement: oncotarget-06-43819-s001.pdf [file oncotarget-06-43819-s001.pdf]

SUPPLEMENTARY FIGURE AND TABLES

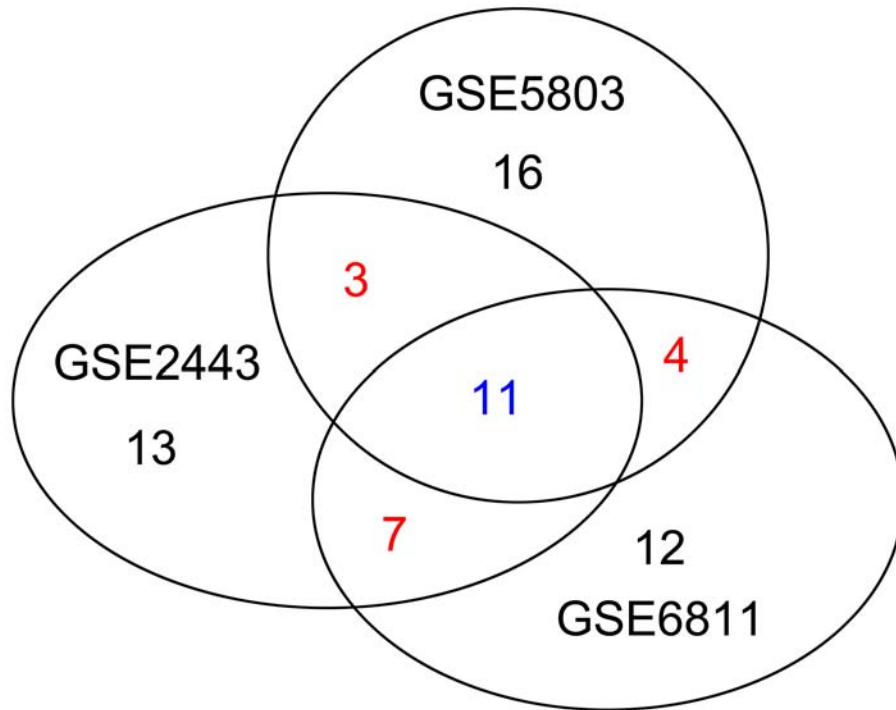

Supplementary Figure S1: Venn diagram illustrating the overlap in microRNA detection across the three data sets.

**Supplementary Table S1: The predicted outlier miRNAs in each dataset**

| miRNA ID         | GSE2443 | GSE5803 | GSE6811 |
|------------------|---------|---------|---------|
| hsa-miR-1        | √       | √       | √       |
| hsa-miR-210      | √       | √       | √       |
| hsa-miR-218(-5p) | √       | √       | √       |
| hsa-miR-155      | √       | √       | √       |
| hsa-miR-145(-5p) | √       | √       | √       |
| hsa-miR-122(-5p) | √       | √       | √       |
| hsa-miR-197(-3p) | √       | √       | √       |
| hsa-miR-346      | √       | √       | √       |
| hsa-let-7b(-5p)  | √       | √       | √       |
| hsa-miR-125b     | √       | √       | √       |
| hsa-miR-124      | √       | √       | √       |
| hsa-miR-149(-5p) | √       |         | √       |
| hsa-miR-585      |         | √       | √       |
| hsa-miR-146a     |         | √       | √       |
| hsa-miR-326      | √       | √       |         |
| hsa-miR-593      | √       | √       |         |
| hsa-miR-626      | √       | √       |         |
| hsa-miR-339(-3p) | √       |         | √       |
| hsa-miR-375      | √       |         | √       |
| hsa-miR-192      | √       |         | √       |
| hsa-miR-126      | √       |         | √       |
| hsa-miR-627      | √       |         | √       |
| hsa-miR-938      | √       |         | √       |
| hsa-miR-490(-3p) |         | √       | √       |
| hsa-miR-378      |         | √       | √       |

**Supplementary Table S2: Highly enriched (P-value < 0.05) KEGG pathways by target genes of 8 experimentally validated key miRNAs**

|     | Pathway Term                                               | Pathway Class                        | Subclass                 | P-Value  |
|-----|------------------------------------------------------------|--------------------------------------|--------------------------|----------|
| 1.  | Pancreatic cancer                                          | Human Diseases                       | Cancers                  | 6.44E-06 |
| 2.  | Pathways in cancer                                         | Human Diseases                       | Cancers                  | 9.18E-06 |
| 3.  | Small cell lung cancer                                     | Human Diseases                       | Cancers                  | 3.27E-05 |
| 4.  | Chronic myeloid leukemia                                   | Human Diseases                       | Cancers                  | 5.47E-05 |
| 5.  | Glioma                                                     | Human Diseases                       | Cancers                  | 6.02E-05 |
| 6.  | Colorectal cancer                                          | Human Diseases                       | Cancers                  | 1.57E-04 |
| 7.  | Non-small cell lung cancer                                 | Human Diseases                       | Cancers                  | 5.44E-04 |
| 8.  | Bladder cancer                                             | Human Diseases                       | Cancers                  | 5.85E-04 |
| 9.  | Melanoma                                                   | Human Diseases                       | Cancers                  | 8.00E-04 |
| 10. | Prostate cancer                                            | Human Diseases                       | Cancers                  | 1.08E-03 |
| 11. | Adherens junction                                          | Cellular Processes                   | Cell Communication       | 1.44E-03 |
| 12. | Endometrial cancer                                         | Human Diseases                       | Cancers                  | 2.15E-03 |
| 13. | Apoptosis                                                  | Cellular Processes                   | Cell Growth and Death    | 3.39E-03 |
| 14. | Cell cycle                                                 | Cellular Processes                   | Cell Growth and Death    | 4.45E-03 |
| 15. | MAPK signaling pathway                                     | Environmental Information Processing | Signal Transduction      | 5.95E-03 |
| 16. | p53 signaling pathway                                      | Cellular Processes                   | Cell Growth and Death    | 9.71E-03 |
| 17. | Epithelial cell signaling in Helicobacter pylori infection | Human Diseases                       | Cardiovascular Diseases  | 1.60E-02 |
| 18. | Acute myeloid leukemia                                     | Human Diseases                       | Cancers                  | 1.60E-02 |
| 19. | Dilated cardiomyopathy                                     | Human Diseases                       | Cardiovascular Diseases  | 1.73E-02 |
| 20. | Arrhythmogenic right ventricular cardiomyopathy (ARVC)     | Human Diseases                       | Cardiovascular Diseases  | 2.51E-02 |
| 21. | Focal adhesion                                             | Cellular Processes                   | Cell Communication       | 2.91E-02 |
| 22. | Endocytosis                                                | Cellular Processes                   | Transport and Catabolism | 3.00E-02 |
| 23. | Hypertrophic cardiomyopathy (HCM)                          | Human Diseases                       | Cardiovascular Diseases  | 3.35E-02 |
| 24. | TGF-beta signaling pathway                                 | Environmental Information Processing | Signal Transduction      | 3.85E-02 |
| 25. | Viral myocarditis                                          | Human Diseases                       | Cardiovascular Diseases  | 3.88E-02 |
| 26. | Regulation of actin cytoskeleton                           | Cellular Processes                   | Cell Communication       | 4.71E-02 |
| 27. | Tight junction                                             | Cellular Processes                   | Cell Communication       | 4.71E-02 |
| 28. | Jak-STAT signaling pathway                                 | Environmental Information Processing | Signal Transduction      | 4.86E-02 |
| 29. | B cell receptor signaling pathway                          | Organismal Systems                   | Immune System            | 4.89E-02 |

**Supplementary Table S3: Top 50 GeneGo pathways enriched by target genes of 8 experimentally validated key miRNAs**

|     | Pathway Term                                                               | Pathway Map Folder      | P-Value  |
|-----|----------------------------------------------------------------------------|-------------------------|----------|
| 1.  | Influence of Ras and Rho proteins on G1/S Transition                       | Cell cycle              | 6.68E-09 |
| 2.  | ESR1 regulation of G1/S transition                                         | Cell cycle              | 9.59E-08 |
| 3.  | Regulation of G1/S transition (part 1)                                     | Cell cycle              | 3.62E-07 |
| 4.  | Cell cycle (generic schema)                                                | Cell cycle              | 5.87E-07 |
| 5.  | TGF, WNT and cytoskeletal remodeling                                       | Cytoskeleton remodeling | 8.68E-07 |
| 6.  | AKT signaling                                                              | Signal transduction     | 1.12E-06 |
| 7.  | Regulation of G1/S transition (part 2)                                     | Cell cycle              | 2.97E-06 |
| 8.  | Role of SCF complex in cell cycle regulation                               | Cell cycle              | 6.61E-06 |
| 9.  | Bracl as a transcription regulator                                         | DNA damag               | 8.43E-06 |
| 10. | PIP3 signaling in cardiac myocytes                                         | Development             | 2.26E-05 |
| 11. | Endothelial cell contacts by junctional mechanisms                         | Cell adhesion           | 4.09E-05 |
| 12. | Role of Activin A in cell differentiation and proliferation                | Development             | 6.20E-05 |
| 13. | CD16 signaling in NK cells                                                 | Immune response         | 6.30E-05 |
| 14. | RalA regulation pathway                                                    | Cytoskeleton remodeling | 9.68E-05 |
| 15. | FGF2-dependent induction of EMT                                            | Development             | 1.22E-04 |
| 16. | Thrombopoietin-regulated cell processes                                    | Development             | 1.35E-04 |
| 17. | Chromosome condensation in prometaphase                                    | Cell cycle              | 1.57E-04 |
| 18. | Caspase cascade                                                            | Apoptosis and survival  | 1.69E-04 |
| 19. | Normal and pathological TGF-beta-mediated regulation of cell proliferation | Development             | 1.69E-04 |
| 20. | CREB pathway                                                               | Transcription           | 1.79E-04 |
| 21. | Macropinocytosis regulation by growth factors                              | Transport               | 1.96E-04 |
| 22. | LRRK2 and immune function in Parkinson's disease                           | Disease                 | 2.00E-04 |
| 23. | Chemokines and adhesion                                                    | Cell adhesion           | 2.40E-04 |
| 24. | Regulation of actin cytoskeleton by Rho GTPases                            | Cytoskeleton remodeling | 2.50E-04 |
| 25. | Cross-talk between Ras-family GTPases                                      | G-protein signaling     | 2.50E-04 |
| 26. | Cytoskeleton remodeling                                                    | Cytoskeleton remodeling | 2.83E-04 |
| 27. | VEGF signaling via VEGFR2 - generic cascades                               | Development             | 2.93E-04 |
| 28. | Endothelial cell contacts by non-junctional mechanisms                     | Cell adhesion           | 3.09E-04 |
| 29. | IGF-1 receptor signaling                                                   | Development             | 3.42E-04 |
| 30. | Nucleocytoplasmic transport of CDK/Cyclins                                 | Cell cycle              | 3.50E-04 |
| 31. | K-RAS regulation pathway                                                   | G-protein signaling     | 3.78E-04 |

(Continued)

|     | <b>Pathway Term</b>                                                                           | <b>Pathway Map Folder</b>  | <b>P-Value</b> |
|-----|-----------------------------------------------------------------------------------------------|----------------------------|----------------|
| 32. | Role of HDAC and calcium/calmodulin-dependent kinase (CaMK) in control of skeletal myogenesis | Development                | 4.34E-04       |
| 33. | Prolactin receptor signaling                                                                  | Development                | 6.75E-04       |
| 34. | Histamine H1 receptor signaling in the interruption of cell barrier integrity                 | Cell adhesion              | 9.62E-04       |
| 35. | Fibronectin-binding integrins in cell motility                                                | Cytoskeleton remodeling    | 1.06E-03       |
| 36. | ACM regulation of nerve impulse                                                               | Neurophysiological process | 1.08E-03       |
| 37. | MIF - the neuroendocrine-macrophage connector                                                 | Immune response            | 1.08E-03       |
| 38. | Alpha-1 adrenergic receptors signaling via cAMP                                               | Development                | 1.22E-03       |
| 39. | PDGF signaling via STATs and NF-kB                                                            | Development                | 1.24E-03       |
| 40. | NF-AT signaling in Cardiac Hypertrophy                                                        | Cardiac Hypertrophy        | 1.34E-03       |
| 41. | Histamine H1 receptor signaling in immune response                                            | Immune response            | 1.36E-03       |
| 42. | Integrin-mediated cell adhesion and migration                                                 | Cell adhesion              | 1.36E-03       |
| 43. | Inhibition of telomerase activity and cellular senescence                                     | DNA damage                 | 1.50E-03       |
| 44. | Oncostatin M signaling via JAK-Stat in human cells                                            | Immune response            | 1.50E-03       |
| 45. | Integrin outside-in signaling                                                                 | Cytoskeleton remodeling    | 1.51E-03       |
| 46. | Erk Interactions: Inhibition of Erk                                                           | Signal transduction        | 1.64E-03       |
| 47. | Cytoplasmic/mitochondrial transport of proapoptotic proteins Bid, Bmf and Bim                 | Apoptosis and survival     | 1.64E-03       |
| 48. | Some pathways of EMT in cancer cells                                                          | Development                | 1.87E-03       |
| 49. | EPO-induced Jak-STAT pathway                                                                  | Development                | 1.87E-03       |
| 50. | Role of heterochromatin protein 1 (HP1) family in transcriptional silencing                   | Transcription              | 2.18E-03       |

**Supplementary Table S4: Literature validated GeneGO pathways from enrichment of genes targeted by 8 key miRNAs**

| Pathway Term                                                               | Enrichment Genes                                                     | Enrichment miRNAs                      | PMID                          |
|----------------------------------------------------------------------------|----------------------------------------------------------------------|----------------------------------------|-------------------------------|
| Regulation of G1/S transition (part 1)                                     | CDKN1B;FBXW7;CDKN1A;ZFYVE9;CCNA2;CCND2;ANAPC1;CCND1;CDK6             | miR-218;miR-197;miR-145;let-7b         | 19646263;15216909             |
| Cell cycle (generic schema)                                                | E2F3;E2F1;CCNA2;CCND2;E2F5;E2F6;CCND1;CDK6                           | miR-210;miR-197;miR-145;let-7b         | 19632176;18097561             |
| AKT signaling                                                              | IKBKB;CDKN1B;IGF1R;FOXO3;CDKN1A;IGF1R;IRS1;MYC;AKT3;GYS1;CCND2;CCND1 | miR-218;miR-197;miR-145;miR-122;let-7b | 14683476;21681193<br>21317204 |
| Regulation of G1/S transition (part 2)                                     | E2F1;CCNA2;AKT3;CCNA2;CCND2;CCND1;CDK6                               | miR-197;miR-145;miR-122;let-7b         | 19646263;15216909             |
| RalA regulation pathway                                                    | ACTG1;RGL2;CALM1;HSF1;RALGDS;PGGTB;RAC1                              | miR-210;miR-149;miR-145;miR-122;let-7b | 16964283                      |
| Normal and pathological TGF-beta mediated regulation of cell proliferation | ZFYVE9;MYC;RAC1;PDGFRA;CCND1                                         | miR-145;miR-122;let-7b                 | 18163430                      |
| CREB pathway                                                               | IGF1R;PRKAR2A;CACNA1D;CALM1;IRS1;RAC1;AKT3;CCND1                     | miR-197;miR-149;miR-145;miR-122;let-7b | 22710715                      |
